# Supplementary material for: Microwave assisted synthesis, characterization and thermoelectric properties of nanocrystalline copper antimony selenide thin films
Source: Royal Society of Chemistry journal article supplement (doi:10.1039/c4ra07609e), 2014-10-02
Supplement: c4ra07609e1.pdf [file c4ra07609e1.pdf]

## Supplementary Information

# Microwave assisted synthesis, characterization and thermoelectric properties of nanocrystalline copper antimony selenide thin films

**Vishvanath B. Ghanwat,<sup>a</sup> Sawanta S. Mali,<sup>b</sup> Suvarta D. Kharade,<sup>a</sup> Nita B. Pawar,<sup>a</sup> Satish V. Patil,<sup>ac</sup> Rahul M. Mane,<sup>a</sup> Pramod S. Patil,<sup>d</sup> Chang Kook Hong,<sup>b</sup> and Popatrao N. Bhosale<sup>\*a</sup>**

<sup>a</sup> Materials Research Laboratory, Department of Chemistry, Shivaji University, Kolhapur – 416 004, India, Fax: +91-231-2691533; Tel: +91-231-2609338; E-mail address: [p.n.bhosale@rediffmail.com](mailto:p.n.bhosale@rediffmail.com), [vishughanwat@yahoo.co.in](mailto:vishughanwat@yahoo.co.in)

<sup>b</sup> School of Applied Chemical Engineering, Chonnam National University, Gwangju, 500-757, South Korea, E-mail: [sawantamali@yahoo.co.in](mailto:sawantamali@yahoo.co.in)

<sup>c</sup> Department of Chemistry, C. T. Bora College, Shirur, Pune, India.

<sup>d</sup> Thin Film Materials Laboratory, Department of Physics, Shivaji University, Kolhapur, 416 004, India.

Figure S1 shows XRD patterns of as deposited thin film samples using microwave assisted technique at different time. As deposited samples shows CuSbSe<sub>2</sub> films with mixed phases of Sb<sub>2</sub>Se<sub>3</sub>, Cu<sub>3</sub>Se<sub>2</sub> and CuSe. In order to study further phase purity we have annealed these samples at 450 K and recorded respective XRD patterns as shown in Figure S2 of Cu<sub>3</sub>SbSe<sub>4</sub>. From XRD results it is clear that all samples in Figure S2 shows perfect pure phase tetragonal Cu<sub>3</sub>SbSe<sub>4</sub>. From the above discussion, we can say that the reported synthetic procedure by home microwave oven for Cu<sub>3</sub>SbSe<sub>4</sub> thin films is highly reproducible. Also photographs of as deposited and annealed films are given in Figure S3.

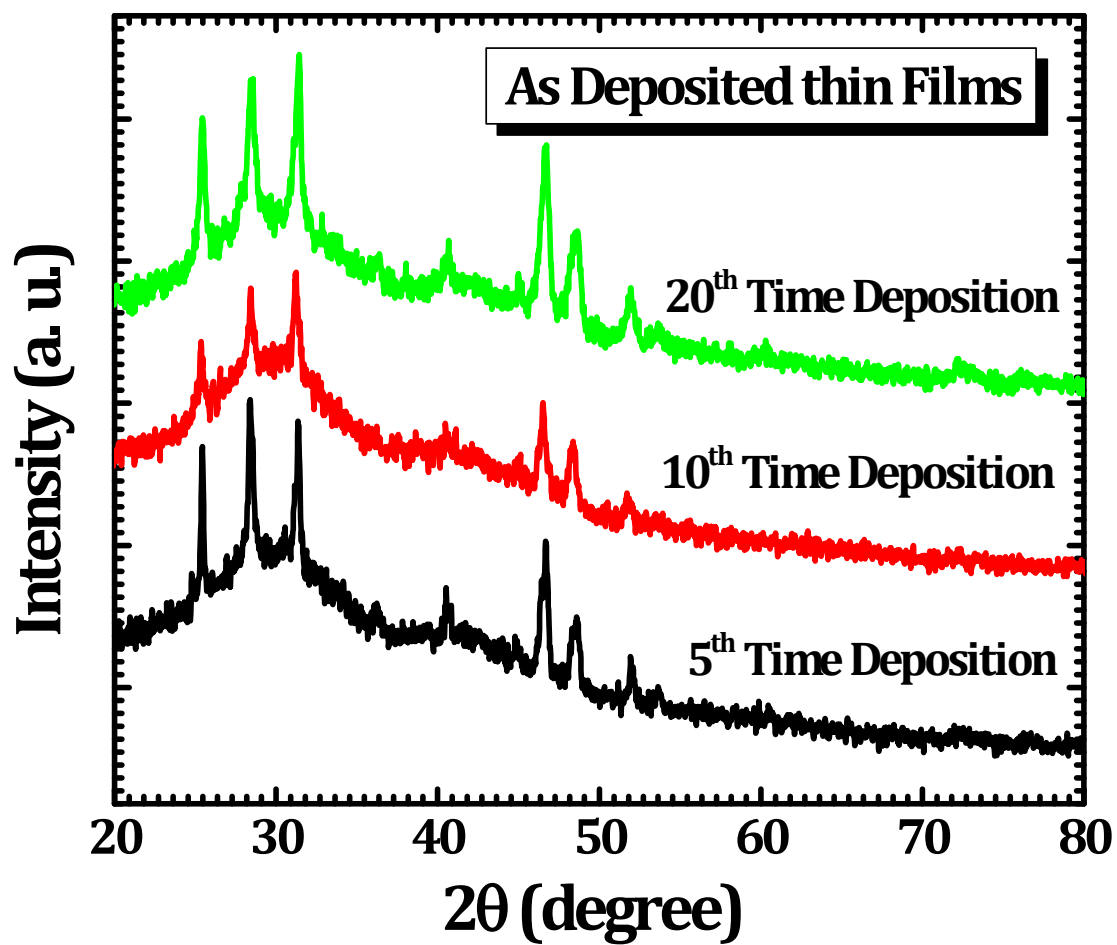

**Figure S1.** XRD patterns of as deposited thin films deposited at different days by microwave assisted technique.

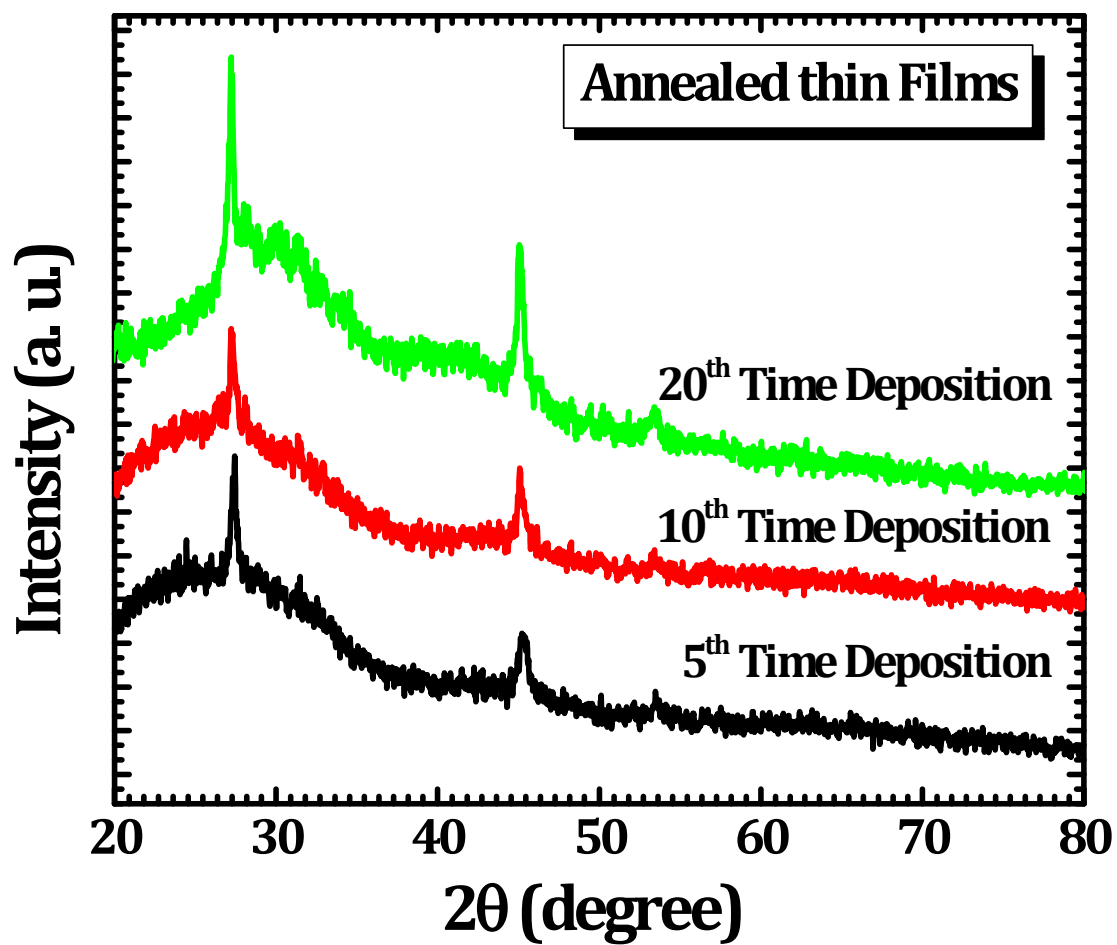

**Figure S2.** XRD patterns of annealed  $\text{Cu}_3\text{SbSe}_4$  thin films deposited at different days by microwave assisted technique.

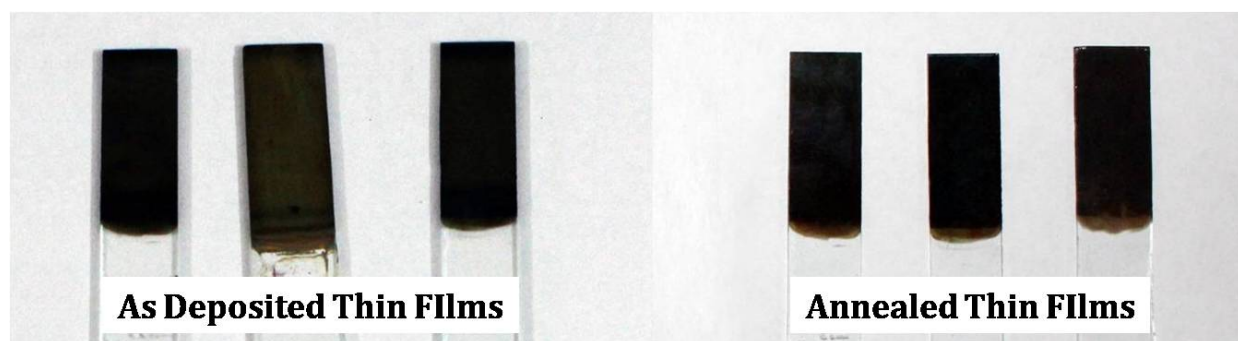

**Figure S3.** Photographs of both as deposited  $\text{CuSbSe}_2$  and annealed  $\text{Cu}_3\text{SbSe}_4$  thin films.
